# Supplementary material for: Fullerene derivatives act as inhibitors of leukocyte common antigen based on molecular dynamics simulations
Source: Royal Society of Chemistry journal article supplement (doi:10.1039/c7ra13543b), 2018-01-01
Supplement: c7ra13543b1.pdf [file c7ra13543b1.pdf]

## Supporting Information

# **Fullerene derivatives act as inhibitors of Leukocyte Common Antigen based on Molecular Dynamics Simulations**

*Yi Yu, Huiyong Sun, Tingjun Hou, Suidong Wang\*, Youyong Li\**

Institute of Functional Nano & Soft Materials (FUNSOM), Soochow University,  
Suzhou 215123, China

Corresponding Author

\*E-mail: [yyli@suda.edu.cn](mailto:yyli@suda.edu.cn), [wangsd@suda.edu.cn](mailto:wangsd@suda.edu.cn) Phone: +86-512-65882037.

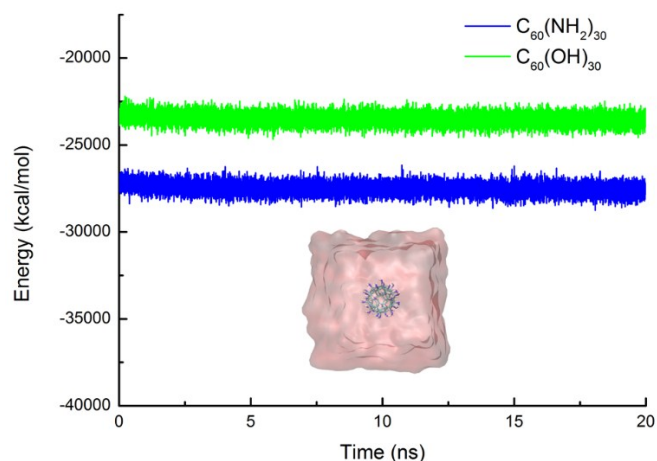

**Figure S1.** The energy of  $C_{60}(NH_2)_{30}/C_{60}(OH)_{30}$  in a water box during 20 ns simulation.

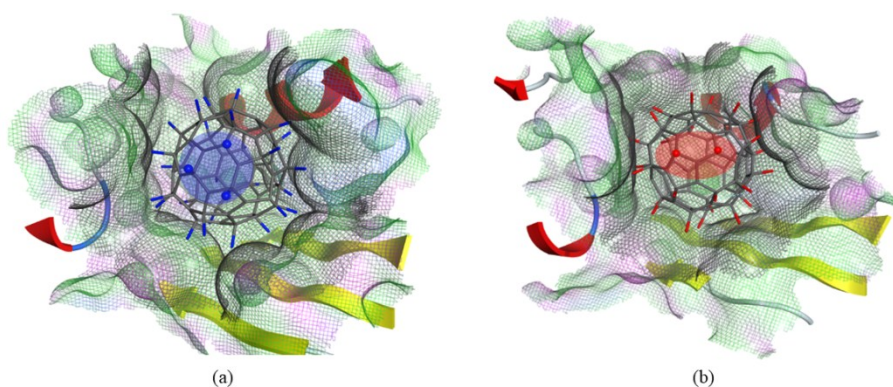

**Figure S2.** The grid of interactions (gray region) between (a)  $C_{60}(NH_2)_{30}$ , (b)  $C_{60}(OH)_{30}$  and CD45. The surfaces of their binding pockets are colored by H-Bonding regions (purple), hydrophobic regions (green), and polar regions (blue). Functional groups that are not involved in interaction are specifically marked by translucent regions.

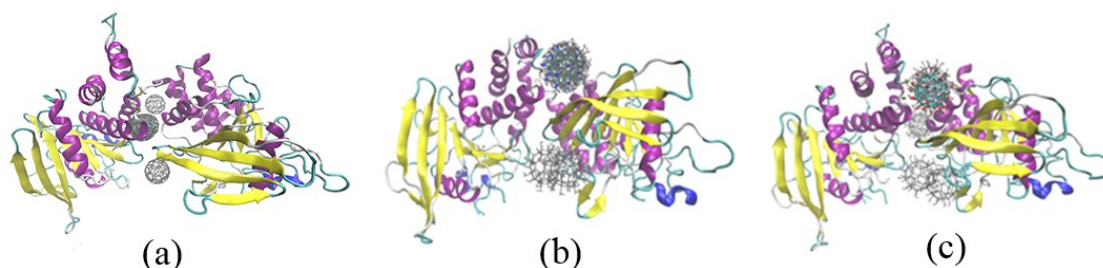

**Figure S3.** Docking poses of (a)  $CD45+C_{60}$ , (b)  $CD45+C_{60}(NH_2)_{30}$ , and (c)  $CD45+C_{60}(OH)_{30}$  (top 50 docking poses). For each system, the docking pose with the highest docking score is represented by licorice and colored by atom name, and the

remaining 49 docking poses are colored in gray. The CD45 is shown with NewCartoon representation, where alpha-helix, beta-sheet, and random coil are shown in purple, yellow, and blue, respectively.

Table S1. The calculated pKa values of all hisdines.

| Hisdines | pKa values |
|----------|------------|
| H609     | 6.977      |
| H761     | 5.353      |
| H788     | 7.254      |
| H797     | 6.934      |
| H804     | 7.286      |
| H827     | 6.883      |
| H881     | 7.152      |
| H901     | 7.228      |
| H905     | 6.816      |
| H936     | 6.134      |
| H1041    | 6.628      |
| H1083    | 5.150      |
| H1143    | 6.788      |

Table S2. The probability of residues that directly interact with  $C_{60}(NH_2)_{30}$  and  $C_{60}(OH)_{30}$ .

|             | $C_{60}(NH_2)_{30}$ | $C_{60}(OH)_{30}$ |
|-------------|---------------------|-------------------|
| Q760        | 95.2%               | 100%              |
| K762        | 100%                | 100%              |
| C764        | 100%                | 42.4%             |
| Y767        | 100%                | 92.6%             |
| I769        | 100%                | 93.5%             |
| K771        | 100%                | 98.1%             |
| T787        | 100%                | 85.0%             |
| I789        | 99.6%               | 89.7%             |
| R811        | 92.6%               | 100%              |
| R812        | 100%                | 100%              |
| V813        | 98.5%               | 93.6%             |
| A815        | 100%                | 100%              |
| F816        | 100%                | 100%              |
| S817        | 30.2%               | 100%              |
| <b>F819</b> | 99.9%               | 0%                |
| <b>F820</b> | 99.7%               | 0%                |

|       |       |       |
|-------|-------|-------|
| E894  | 65.2% | 65.4% |
| N896  | 86.5% | 96.5% |
| T1166 | 99.6% | 91.6% |
| E1167 | 100%  | 100%  |
| E1168 | 100%  | 100%  |
| V1169 | 100%  | 100%  |

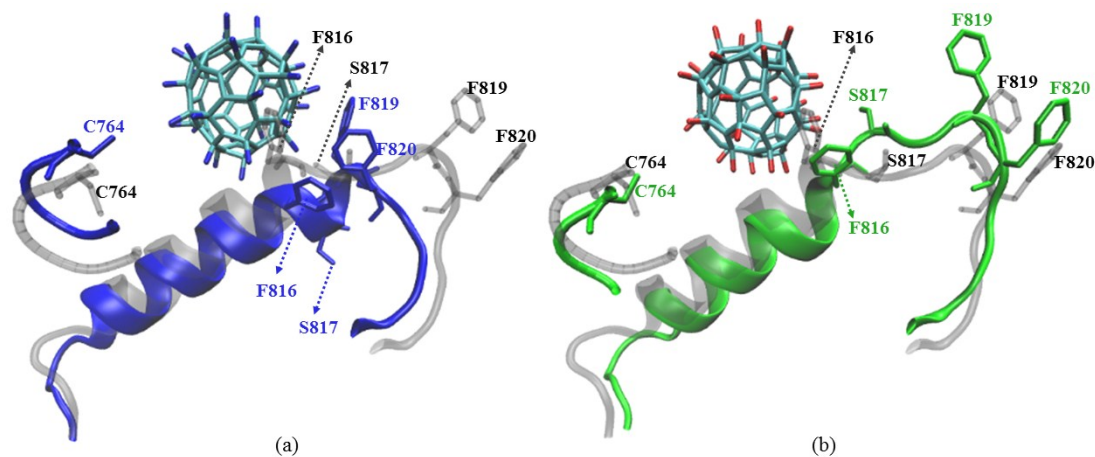

Figure S4. Comparison of the segment (C764 to D766, P800 to I824) of CD45 in crystal structure (gray) with the structure bound with  $C_{60}(NH_2)_{30}$  (blue), and  $C_{60}(OH)_{30}$  (green). C764, F816, S817, F819 and F820 are represented in relative colors.

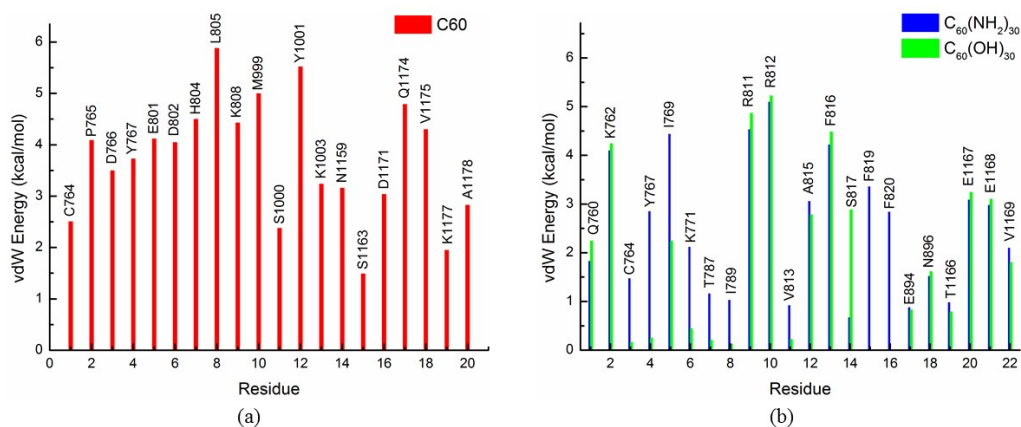

Figure S5. The vdW energy between every residue of binding pocket and  $C_{60}$  (red)  $C_{60}(NH_2)_{30}$  (blue),  $C_{60}(OH)_{30}$  (green).

Table S3. The full name and the abbreviation of amino acids

| Full name | Abbreviation |
|-----------|--------------|
| Gly       | G            |
| Ala       | A            |
| Val       | V            |
| Leu       | L            |
| Ile       | I            |
| Phe       | F            |
| Pro       | P            |
| Ser       | S            |
| Thr       | T            |
| His       | H            |
| Trp       | W            |
| Cys       | C            |
| Asp       | D            |
| Glu       | E            |
| Lys       | K            |
| Tyr       | Y            |
| Met       | M            |
| Asn       | N            |
| Gln       | Q            |
| Arg       | R            |
